# Supplementary material for: Meroterpenoid-Rich Ethanoic Extract of Sargassum macrocarpum Ameliorates Dextran Sulfate Sodium-Induced Colitis in Mice
Source: MDPI journal article supplement (doi:10.3390/foods11030329), 2022-01-25
Supplement: s1 [file s1]

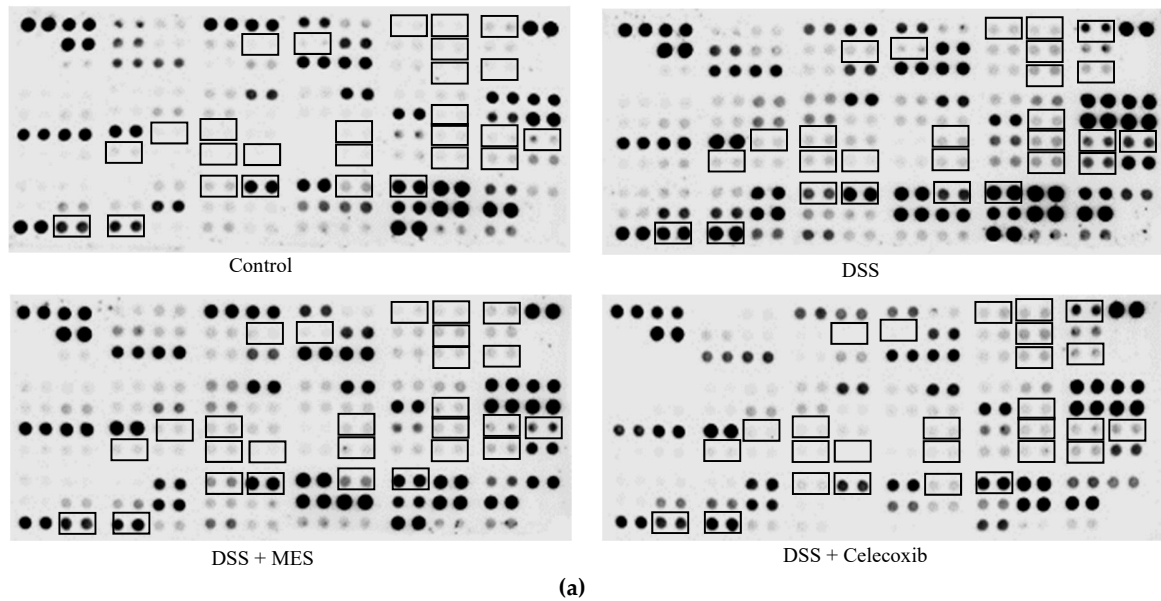

|                      | Control | DSS | DSS+MES | DSS+celecoxib |
|----------------------|---------|-----|---------|---------------|
| MCP-1                | 0.357   | 1   | 0.37    | 0.143         |
| MIP-1 $\alpha/\beta$ | 0.12    | 1   | 0.358   | 1.299         |
| RANTES               | 0.146   | 1   | 0.071   | 0.211         |
| MIP-3 $\beta$        | 0.104   | 1   | 0.551   | 2.00E-03      |
| MIP-3 $\alpha$       | 0.266   | 1   | 0.363   | 0.014         |
| CD14                 | 0.211   | 1   | 0.649   | 1.077         |
| KC                   | 0.114   | 1   | 0.392   | 0.619         |
| MIP-2                | 0.182   | 1   | 0.612   | 0.747         |
| IFN- $\gamma$        | 0.195   | 1   | 0.04    | 0.487         |
| M-CSF                | 0.343   | 1   | 0.597   | 0.216         |
| MMP-2                | 0.691   | 1   | 0.03    | 0.293         |
| MMP-9                | 0.393   | 1   | 0.552   | 0.256         |
| Myeloperoxidase      | 0.565   | 1   | 0.429   | 0.361         |
| E-selectin           | 0.498   | 1   | 0.504   | 0.413         |
| P-selectin           | 0.27    | 1   | 0.38    | 0.415         |
| IL-1 $\alpha$        | 0.191   | 1   | 0.688   | 0.334         |
| IL-1 $\beta$         | 0.193   | 1   | 0.902   | 0.263         |
| IL-3                 | 0.158   | 1   | 0.723   | 0.346         |
| IL-5                 | 0.16    | 1   | 0.415   | 0.397         |
| IL-6                 | 0.121   | 1   | 0.49    | 0.294         |
| IL-7                 | 0.253   | 1   | 0.645   | 0.346         |
| IL-12p40             | 0.407   | 1   | 0.504   | 0.301         |
| IL-15                | 0.07    | 1   | 0.653   | 0.119         |
| IL-17A               | 0.668   | 1   | 0.505   | 0             |
| IL-23                | 0.028   | 1   | 0.932   | 0.032         |
| IL-28A/B             | 0.253   | 1   | 0.331   | 0.324         |
| IL-33                | 0.19    | 1   | 0.247   | 0.254         |

0.2 0.4 0.6 0.8 1

(b)

Supplementary Figure S1. MES supplementation suppresses levels of pro-inflammatory cytokines in serum of DSS-

treated mice. (a). Proteome Profile Mouse XL Cytokine Array kit was used to semi-quantify mouse cytokines in the pooled serum from each group. (b). Heatmap analysis illustrated the spot density of cytokines suppressed by MES or celecoxib.
